# Supplementary material for: Association between Pulmonary Aspergillosis and Cytomegalovirus Reactivation in Critically Ill COVID-19 Patients: A Prospective Observational Cohort Study
Source: MDPI journal article supplement (doi:10.3390/v15112260), 2023-11-15
Supplement: s1 [file s1]

**Table S1.** Measured outcomes during intensive care stay and hospital mortality in all the patients and in patients with and without CAPA.

| OUTCOME                                                              | All population<br>(n=579) | No CAPA<br>(n=483) | CAPA<br>(n=96)  | p value |
|----------------------------------------------------------------------|---------------------------|--------------------|-----------------|---------|
| ICU mortality (n, %)                                                 | 157 (27,1%)               | 109 (22,6%)        | 48 (50%)        | <0.001  |
| 90-day mortality (n, %)                                              | 182 (31,5%)               | 130 (27%)          | 52 (54,2%)      | <0.001  |
| ICU length of stay (days;<br>median, IQR)                            | 8 (4-18)                  | 7 (4-14)           | 19 (8-39)       | <0.001  |
| Hospital length of stay (days;<br>median, IQR)                       | 23 (15-37)                | 22(14-35)          | 31 (20-54)      | <0.001  |
| Mechanical ventilation-free<br>days at day 60 (days; median,<br>IQR) | 51 (0-57)                 | 53 (0-58)          | 0 (0-35)        | <0.001  |
| Time to CAPA occurrence<br>(days; median, IQR)                       | 5,5 (1,0-12,0)            |                    | 5,5 (1,0-12,0)  |         |
| Secondary bacterial infection<br>(n, %)                              | 200 (34, 5%)              | 139 (28.8%)        | 61 (63.5%)      | <0.001  |
| Bacteremia (n, %)                                                    | 85 (14,7%)                | 61 (12.7%)         | 24 (25%)        | 0.002   |
| Pneumonia (n, %)                                                     | 162 (28%)                 | 113 (23.4%)        | 49 (51%)        | <0.001  |
| Viral reactivations (n, %)                                           | 181 (58,8%)               | 128 (53,8%)        | 53 (75,7%)      | 0.001   |
| CMV reactivation (n, %)                                              | 117 (20,6)                | 77 (16,3)          | 40 (41,7)       | <0,001  |
| Peak CMV-DNA load<br>(copies/ml; median, IQR)                        | 671 (194-1741)            | 441 (155-1374)     | 1077 (499-2649) | 0,015   |
| Time to CMV reactivation<br>(days; median, IQR)                      | 14(4-24)                  | 13 (3-23)          | 18 (7-27)       | 0,154   |
